# Supplementary material for: Sesame oleosins are minor allergens
Source: Springer Nature journal article supplement (doi:10.1186/s13601-019-0271-x), 2019-06-28
Supplement: MOESM3 [file 16866244]

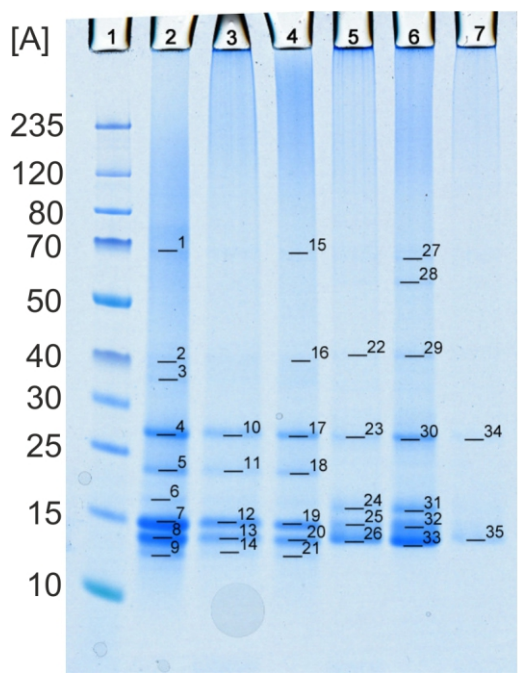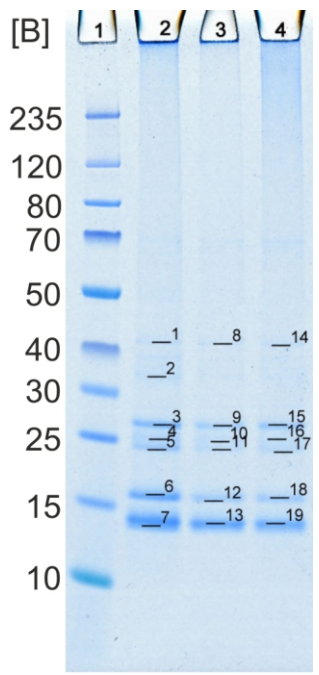

- [A]  
 1 - Marker  
 2 - OAPs sesame HIC-fraction 3  
 3 - OAPs sesame HIC-fraction 4  
 4 - OAPs sesame HIC-fraction 5  
 5 - OAPs walnut HIC-fraction 3  
 6 - OAPs walnut HIC-fraction 4  
 7 - OAPs walnut HIC-fraction 5
- [B]  
 1 - Marker  
 2 - OAPs pecan nut HIC-fraction 3  
 3 - OAPs pecan nut HIC-fraction 4  
 4 - OAPs pecan nut HIC-fraction 5

**Figure S2:** Enclosed proteins of the native OAPs fractions from sesame, walnut and pecan nut were identified by mass spectrometry. The proteins were separated by gel electrophoresis using 4-12% bis-tris gels and the bands were excised and in-gel digested with trypsin.

[A] Elution fractions of hydrophobic interaction chromatography (HIC) from sesame (line 2-4) and walnut (line 5-7) OAPs

[B] Elution fractions of hydrophobic interaction chromatography (HIC) from pecan nut OAPs (line 2-4)
