# Supplementary material for: Sesame oleosins are minor allergens
Source: Springer Nature journal article supplement (doi:10.1186/s13601-019-0271-x), 2019-06-28
Supplement: MOESM4 [file 16866244]

**Table S1:** The native sesame OAPs fractions was analysed by mass spectrometry using peptide mass fingerprint. The table shows the identified proteins in this fraction.

| Band                                       | Protein<br>(Accession number)                                    | Cut-Off | Protein Score | Sequence coverage [%] | Molecular Mass [kDa] |
|--------------------------------------------|------------------------------------------------------------------|---------|---------------|-----------------------|----------------------|
| <b>Sesame OAPs: HIC-Elution-Fraction 3</b> |                                                                  |         |               |                       |                      |
| 1                                          | uncharacterized protein LOC105177100<br>(NP_001292915.1)         | 49      | 45            | 10                    | 17,4                 |
|                                            | 15 kDa oleosin<br>(AAD42942.1)                                   | 49      | 23            | 6                     | 15,2                 |
|                                            | PREDICTED: oleosin 1-like<br>(XP_011076526.1)                    | 49      | 23            | 4                     | 24,0                 |
| 2                                          | 11-beta-hydroxysteroid dehydrogenase-like 5<br>(NP_001291330.1)  | 79/50   | 169/55        | 54/4                  | 41,3                 |
| 3                                          | 11-beta-hydroxysteroid dehydrogenase 1B-like<br>(NP_001291322.1) | 79/50   | 125/31        | 50/2                  | 39,7                 |
|                                            | 11-beta-hydroxysteroid dehydrogenase-like 5<br>(NP_001291330.1)  | 79/50   | 87/20         | 41/4                  | 41,3                 |
| 4                                          | peroxygenase<br>(NP_001291323.1)                                 | 79/50   | 76/115        | 40/23                 | 27,8                 |
| 5                                          | PREDICTED: legumin B-like<br>(XP_011083024.1)                    | 79/50   | 93/59         | 35/8                  | 52,1                 |
|                                            | Peroxygenase<br>(NP_001291323.1)                                 | 79/50   | 80/81         | 32/10                 | 27,8                 |
|                                            | 11S globulin precursor isoform 4<br>(ABB60055.1)                 | 79/50   | 80/59         | 32/8                  | 53,0                 |
| 6                                          | PREDICTED: legumin B-like<br>(XP_011083024.1)                    | 79      | 72            | 33                    | 52,1                 |
|                                            | 11S globulin precursor isoform 4<br>(ABB60055.1)                 | 79      | 60            | 28                    | 53,0                 |
|                                            | 15 kDa oleosin<br>(AAD42942.1)                                   | 50      | 22            | 6                     | 15,2                 |
|                                            | PREDICTED: oleosin 1-like<br>(XP_011076526.1)                    | 50      | 22            | 4                     | 24,0                 |
| 7                                          | 15 kDa oleosin<br>(AAD42942.1)                                   | 50      | 61            | 6                     | 15,2                 |
|                                            | PREDICTED: oleosin 1-like<br>(XP_011076526.1)                    | 50      | 61            | 4                     | 24,0                 |
| 8                                          | uncharacterized protein LOC105177100<br>(NP_001292915.1)         | 51      | 43            | 10                    | 17,4                 |
| 9                                          | uncharacterized protein LOC105177100<br>(NP_001292915.1)         | 49      | 40            | 10                    | 17,4                 |
|                                            | 15 kDa oleosin<br>(AAD42942.1)                                   | 49      | 35            | 6                     | 15,2                 |
|                                            | PREDICTED: oleosin 1-like<br>(XP_011076526.1)                    | 49      | 35            | 4                     | 24,0                 |
|                                            | PREDICTED: oleosin 16.4 kDa<br>(XP_011097414.1)                  | 49      | 20            | 10                    | 17,4                 |

**Sesame OAPs: HIC-Elution-Fraction 4**

|    |                                                                            |       |        |      |      |
|----|----------------------------------------------------------------------------|-------|--------|------|------|
| 10 | Peroxygenase<br>( <i>NP_001291323.1</i> )                                  | 79/49 | 108/27 | 41/8 | 27,8 |
| 11 | Peroxygenase<br>( <i>NP_001291323.1</i> )                                  | 51    | 81     | 10   | 27,8 |
| 12 | uncharacterized protein LOC105177100<br>( <i>NP_001292915.1</i> )          | 79    | 57     | 39   | 17,4 |
|    | 15 kDa oleosin<br>( <i>AAD42942.1</i> )                                    | 50    | 47     | 6    | 15,2 |
|    | PREDICTED: oleosin 1-like<br>( <i>XP_011076526.1</i> )                     | 50    | 47     | 4    | 24,0 |
| 13 | uncharacterized protein LOC105177100<br>( <i>NP_001292915.1</i> )          | 51    | 24     | 10   | 17,4 |
|    | PREDICTED: oleosin 1-like<br>( <i>XP_011081346.1</i> )                     | 51    | 22     | 7    | 14,8 |
|    | 15 kDa oleosin<br>( <i>AAD42942.1</i> )                                    | 51    | 21     | 6    | 15,2 |
|    | PREDICTED: oleosin 1-like<br>( <i>XP_011076526.1</i> )                     | 51    | 21     | 4    | 24,0 |
| 14 | PREDICTED: DDB1- and CUL4-associated factor 8<br>( <i>XP_011089371.1</i> ) | 79    | 58     | 22   | 54,1 |
|    | uncharacterized protein LOC105177100<br>( <i>NP_001292915.1</i> )          | 49    | 15     | 10   | 17,4 |

**Sesame OAPs: HIC-Elution-Fraction 5**

|    |                                                                            |       |        |       |      |
|----|----------------------------------------------------------------------------|-------|--------|-------|------|
| 15 | -                                                                          | -     | -      | -     | -    |
| 16 | 11-beta-hydroxysteroid dehydrogenase-like 5<br>( <i>NP_001291330.1</i> )   | 79/50 | 190/70 | 53/7  | 41,3 |
| 17 | Peroxygenase<br>( <i>NP_001291323.1</i> )                                  | 79/50 | 119/73 | 53/13 | 27,8 |
| 18 | Peroxygenase<br>( <i>NP_001291323.1</i> )                                  | 79/50 | 80/63  | 27/10 | 27,8 |
| 19 | uncharacterized protein LOC105177100<br>( <i>NP_001292915.1</i> )          | 50    | 67     | 10    | 17,4 |
|    | 15 kDa oleosin<br>( <i>AAD42942.1</i> )                                    | 50    | 52     | 6     | 15,2 |
|    | PREDICTED: oleosin 1-like<br>( <i>XP_011076526.1</i> )                     | 50    | 52     | 4     | 24,0 |
| 20 | PREDICTED: oleosin 1-like<br>( <i>XP_011081346.1</i> )                     | 51    | 46     | 7     | 14,8 |
|    | uncharacterized protein LOC105177100<br>( <i>NP_001292915.1</i> )          | 51    | 43     | 10    | 17,4 |
| 21 | PREDICTED: DDB1- and CUL4-associated factor 8<br>( <i>XP_011089371.1</i> ) | 79    | 91     | 36    | 54,1 |
|    | uncharacterized protein LOC105177100<br>( <i>NP_001292915.1</i> )          | 49    | 17     | 10    | 17,4 |

Cut-off, protein-score and sequence coverage are highlighted in green if the results were obtained from MS/MS experiments

**Table S2:** The native walnut OAPs fractions was analysed by mass spectrometry using peptide mass fingerprint. The table shows the identified proteins in this fraction.

| Band                                       | Protein<br>(Accession number) | Cut-Off | Protein Score | Sequence coverage [%] | Molecular Mass [kDa] |
|--------------------------------------------|-------------------------------|---------|---------------|-----------------------|----------------------|
| <b>Walnut OAPs: HIC-Elution-Fraction 3</b> |                               |         |               |                       |                      |
| 22                                         | -                             | -       | -             | -                     | -                    |
| 23                                         | -                             | -       | -             | -                     | -                    |
| 24                                         | -                             | -       | -             | -                     | -                    |
| 25                                         | -                             | -       | -             | -                     | -                    |
| 26                                         | Oleosin<br>(AET74077.1)       | 79      | 40            | 38                    | 14,7                 |
| <b>Walnut OAPs: HIC-Elution-Fraction 4</b> |                               |         |               |                       |                      |
| 27                                         | -                             | -       | -             | -                     | -                    |
| 28                                         | -                             | -       | -             | -                     | -                    |
| 29                                         | -                             | -       | -             | -                     | -                    |
| 30                                         | -                             | -       | -             | -                     | -                    |
| 31                                         | -                             | -       | -             | -                     | -                    |
| 32                                         | -                             | -       | -             | -                     | -                    |
| 33                                         | Oleosin<br>(AET74077.1)       | 79      | 48            | 38                    | 14,7                 |
| <b>Walnut OAPs: HIC-Elution-Fraction 5</b> |                               |         |               |                       |                      |
| 34                                         | -                             | -       | -             | -                     | -                    |
| 35                                         | Oleosin<br>(AET74077.1)       | 79      | 53            | 35                    | 14,7                 |

Cut-off, protein-score and sequence coverage are highlighted in green if the results were obtained from MS/MS experiments

**Table S3:** The native pecan nut OAPs fractions was analysed by mass spectrometry using peptide mass fingerprint. The table shows the identified proteins in this fraction.

| Band                                          | Protein<br>(Accession number) | Cut-<br>Off | Protein<br>Score | Sequence<br>coverage [%] | Molecular Mass<br>[kDa] |
|-----------------------------------------------|-------------------------------|-------------|------------------|--------------------------|-------------------------|
| <b>Pecan nut OAPs: HIC-Elution-Fraction 3</b> |                               |             |                  |                          |                         |
| 1                                             | -                             | -           | -                | -                        | -                       |
| 2                                             | -                             | -           | -                | -                        | -                       |
| 3                                             | -                             | -           | -                | -                        | -                       |
| 4                                             | -                             | -           | -                | -                        | -                       |
| 5                                             | -                             | -           | -                | -                        | -                       |
| 6                                             | -                             | -           | -                | -                        | -                       |
| 7                                             | -                             | -           | -                | -                        | -                       |
| <b>Pecan nut OAPs: HIC-Elution-Fraction 4</b> |                               |             |                  |                          |                         |
| 8                                             | -                             | -           | -                | -                        | -                       |
| 9                                             | -                             | -           | -                | -                        | -                       |
| 10                                            | -                             | -           | -                | -                        | -                       |
| 11                                            | -                             | -           | -                | -                        | -                       |
| 12                                            | -                             | -           | -                | -                        | -                       |
| 13                                            | -                             | -           | -                | -                        | -                       |
| <b>Pecan nut OAPs: HIC-Elution-Fraction 5</b> |                               |             |                  |                          |                         |
| 14                                            | -                             | -           | -                | -                        | -                       |
| 15                                            | -                             | -           | -                | -                        | -                       |
| 16                                            | -                             | -           | -                | -                        | -                       |
| 17                                            | -                             | -           | -                | -                        | -                       |
| 18                                            | -                             | -           | -                | -                        | -                       |
| 19                                            | -                             | -           | -                | -                        | -                       |

Cut-off, protein-score and sequence coverage are highlighted in green if the results were obtained from MS/MS experiments
