# Supplementary material for: Sesame oleosins are minor allergens
Source: Springer Nature journal article supplement (doi:10.1186/s13601-019-0271-x), 2019-06-28
Supplement: MOESM5 [file 16866244]

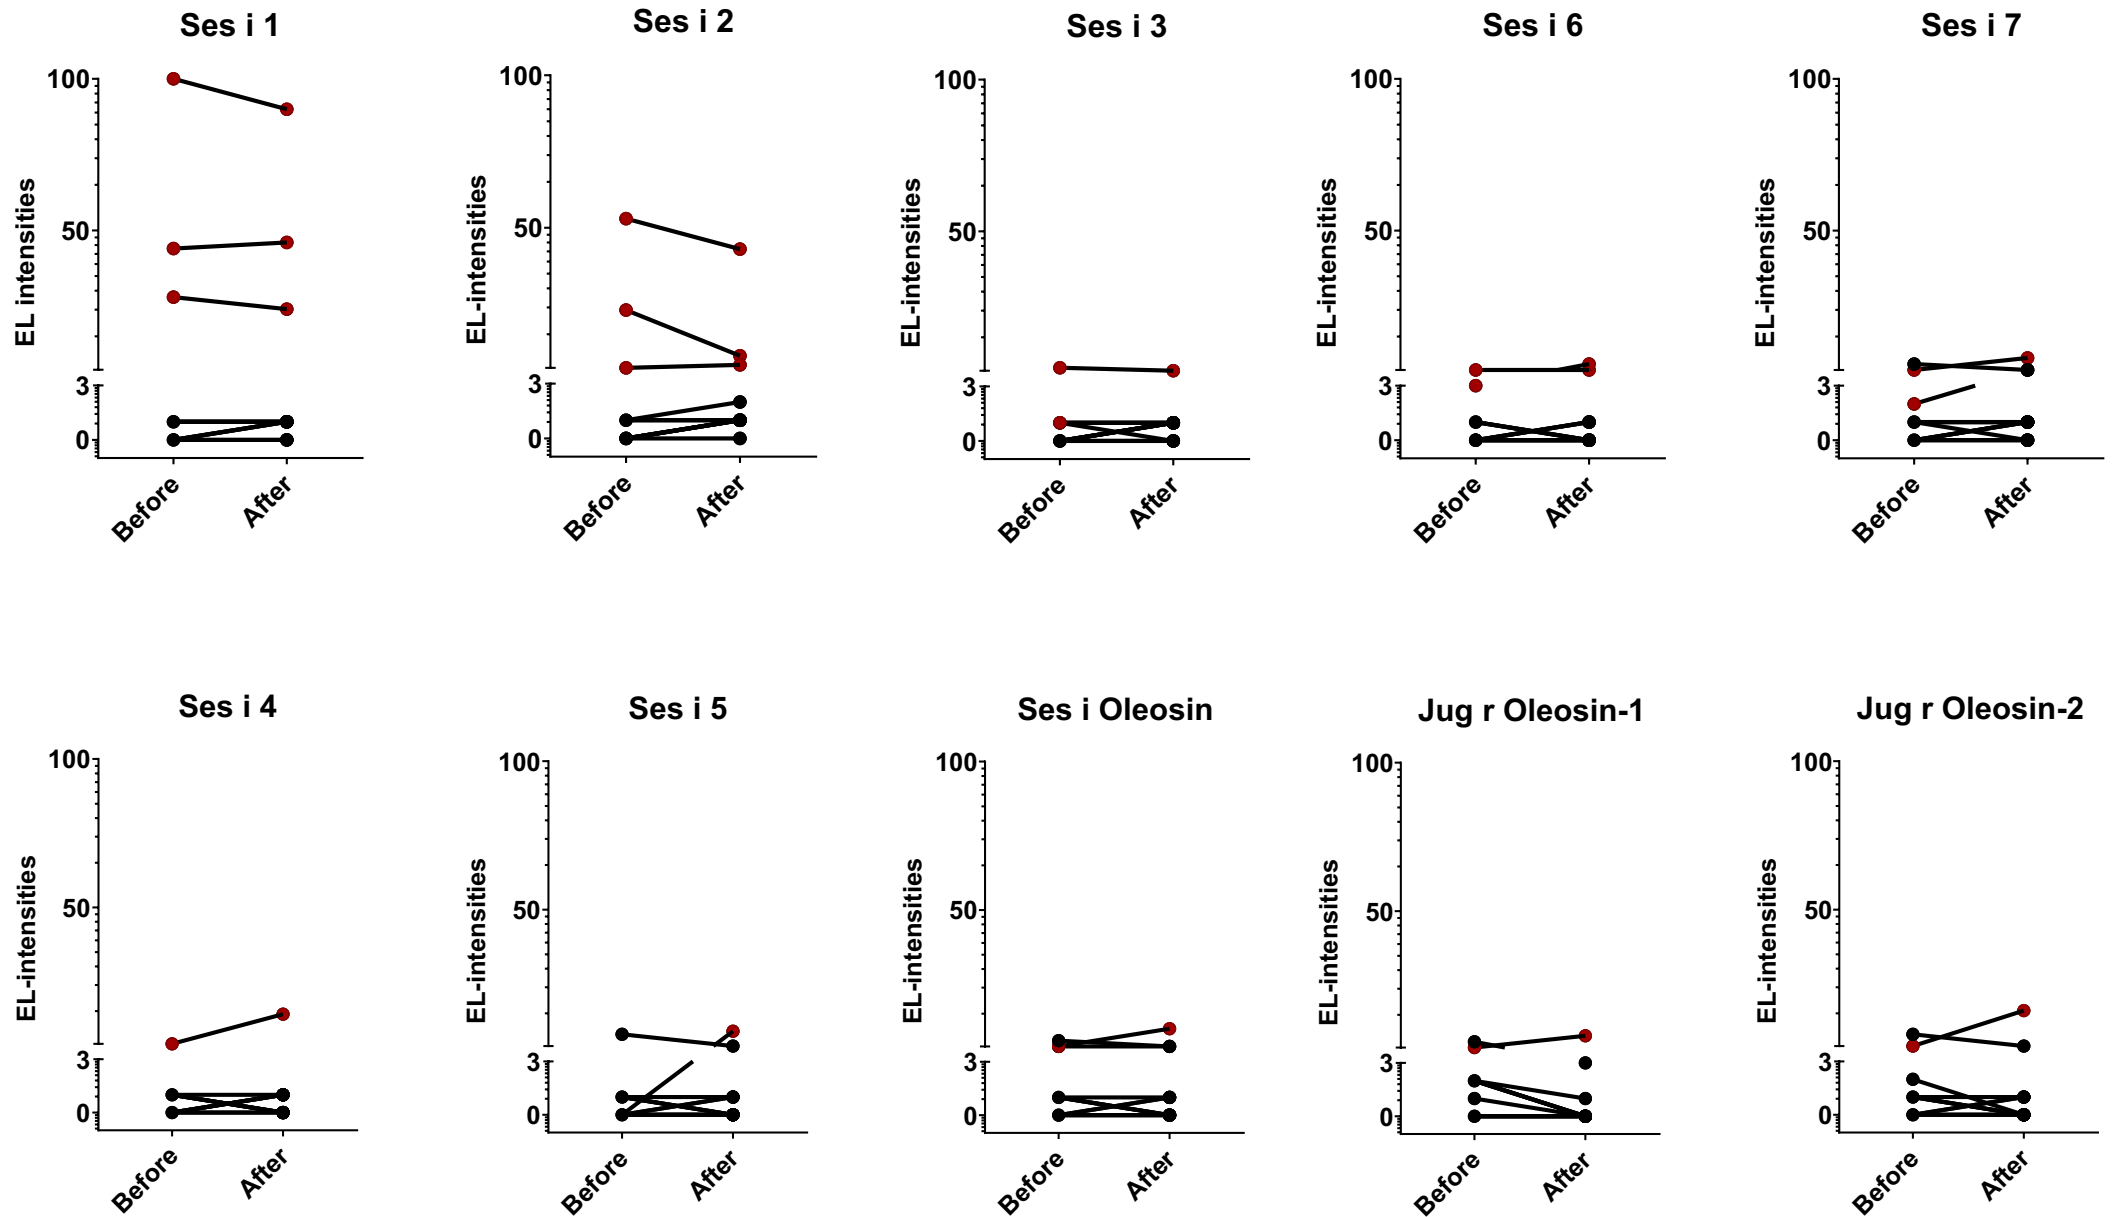

**Figure S3:** Sera with sIgE levels greater than an EUROLINE (EL-) intensity of 3 were marked accordingly to their study group (green: group 1a – sesame allergic without sensitisation, red: group 1b – sesame allergic with sensitisation, black: group 2 – sesame tolerant with sensitisation).
